# Supplementary material for: Comprehensive Ecological Risk Assessment of Heavy Metals Based on Species Sensitivity Distribution in Aquatic of Coastal Areas in Hong Kong
Source: MDPI journal article supplement (doi:10.3390/ijerph192013376), 2022-10-17
Supplement: s1 [file s1]

**Table S1** Detection limits and relative standard deviation of seven heavy metals in seawater, sediments, and organisms.

|                             |                   | Hg    | Cd    | Pb    | Cu    | Cr     | As    | Zn    |
|-----------------------------|-------------------|-------|-------|-------|-------|--------|-------|-------|
| Detection limit             | Seawater (µg/L)   | 0.001 | 0.010 | 0.030 | 0.200 | 0.400  | 0.500 | 3.100 |
|                             | Sediments (mg/kg) | 0.002 | 0.040 | 1.000 | 0.500 | 2.000  | 0.060 | 6.000 |
|                             | Organisms (mg/kg) | 0.002 | 0.005 | 0.040 | 0.400 | 0.040  | 0.200 | 0.400 |
| Relative standard deviation | Seawater          | 2.50% | 4.20% | 3.90% | 5.20% | 3.20%  | 3.00% | 6.90% |
|                             | Sediments         | 4.00% | 6.60% | 6.30% | 0.10% | 2.90%  | 5.00% | 2.30% |
|                             | Organisms         | 8.00% | 3.60% | 6.40% | 1.60% | 10.00% | 1.50% | 4.90% |

**Table S2** The raw data of seven heavy metals in seawater.

| Site                       | Cu     | Pb   | Zn    | Cd   | As   | Cr   | Hg    | Cu     | Pb   | Zn   | Cd   | As  | Cr  | Hg    |
|----------------------------|--------|------|-------|------|------|------|-------|--------|------|------|------|-----|-----|-------|
|                            | (μg/L) |      |       |      |      |      |       | (μg/L) |      |      |      |     |     |       |
| Season                     | Spring |      |       |      |      |      |       | Autumn |      |      |      |     |     |       |
| H1                         | 1.3    | 0.2  | 11.26 | 0.01 | ND   | 0.25 | 0.028 | 1.8    | 0.55 | 19.7 | 0.02 | 0.8 | ND  | 0.021 |
| H2                         | ND     | 0.19 | 5.04  | 0.01 | ND   | 0.11 | 0.02  | 1      | 3.62 | 8.2  | ND   | 1.2 | ND  | 0.021 |
| H3                         | 4.78   | 0.76 | 15.25 | 0.02 | ND   | 0.45 | ND    | ND     | 0.27 | 10.4 | 0.02 | 1   | ND  | 0.041 |
| H4                         | 0.25   | 0.47 | 16.46 | 0.09 | ND   | 0.26 | 0.022 | 0.6    | 0.13 | ND   | ND   | 1   | ND  | 0.076 |
| H5                         | ND     | 0.02 | ND    | ND   | ND   | 0.27 | 0.021 | ND     | 0.22 | ND   | ND   | 1   | ND  | 0.05  |
| H6                         | ND     | 0.24 | 15.9  | ND   | ND   | 0.17 | 0.047 | 1      | 2.62 | 17.4 | 0.02 | 0.9 | ND  | 0.031 |
| H7                         | ND     | 0.26 | 12.03 | ND   | ND   | 0.14 | 0.021 | 0.7    | 0.2  | 19.4 | 0.02 | 1.2 | ND  | 0.023 |
| H8                         | 0.6    | 0.24 | 25.11 | ND   | 6.94 | 0.2  | 0.03  | ND     | 0.52 | 5.4  | ND   | 0.8 | ND  | 0.041 |
| H9                         | ND     | 0.18 | 9.95  | ND   | ND   | 0.14 | 0.031 | ND     | ND   | ND   | ND   | 1   | ND  | 0.031 |
| H10                        | ND     | 0.18 | 7.52  | ND   | 0.88 | 0.39 | 0.038 | 0.6    | 0.18 | 10.5 | ND   | 1.1 | ND  | 0.024 |
| H11                        | 1.26   | 0.95 | 11.71 | 0.04 | ND   | 0.15 | 0.047 | 0.6    | 0.2  | 23.6 | 0.02 | 1.1 | ND  | 0.055 |
| H12                        | ND     | 0.33 | 18.38 | ND   | ND   | 0.14 | 0.015 | 1.6    | 0.63 | 17.6 | 0.02 | 1.2 | ND  | 0.022 |
| H13                        | 0.23   | 0.39 | 25.87 | ND   | ND   | 0.26 | 0.016 | ND     | 0.37 | 3.4  | ND   | 1.2 | ND  | 0.042 |
| H14                        | 0.34   | 0.84 | 5.88  | 0.09 | ND   | 0.18 | ND    | ND     | 0.21 | ND   | ND   | 1.1 | ND  | 0.037 |
| H15                        | ND     | 0.24 | 9.66  | ND   | ND   | 0.45 | ND    | ND     | 0.1  | 27   | ND   | 1   | ND  | 0.093 |
| H16                        | ND     | 0.17 | 18.93 | ND   | ND   | 0.24 | 0.06  | 0.6    | 0.11 | ND   | ND   | 1.2 | ND  | 0.118 |
| H17                        | ND     | 1.19 | 22.11 | 0.01 | ND   | 0.15 | ND    | ND     | 0.28 | 3.8  | ND   | 0.9 | ND  | 0.034 |
| H18                        | 0.2    | 0.13 | 3.8   | ND   | ND   | 0.18 | 0.044 | ND     | 0.26 | ND   | ND   | 1.2 | ND  | 0.064 |
| H19                        | 3.74   | 1.16 | 12.83 | 0.01 | ND   | 0.17 | 0.034 | 0.5    | 1.27 | 14.8 | ND   | 1.1 | ND  | 0.017 |
| H20                        | 0.3    | 0.29 | 23    | ND   | ND   | 0.16 | 0.036 | ND     | ND   | 22.2 | ND   | 0.9 | /   | 0.029 |
| H21                        | 0.21   | 0.39 | 12.79 | ND   | ND   | 0.18 | 0.012 | 0.6    | 0.28 | 8.2  | ND   | 1   | 0.5 | 0.051 |
| ND indicates not detected. |        |      |       |      |      |      |       |        |      |      |      |     |     |       |



**Table S4** The raw data of seven heavy metals in organisms.

| Site | Season | Species                     | Cu   | Pb   | Zn   | Cd    | Hg     | As   | Cr   |
|------|--------|-----------------------------|------|------|------|-------|--------|------|------|
| y1   | Spring | Greater lizardfish          | <0.4 | 0.22 | 7    | 0.049 | 0.022  | 1.17 | 1.54 |
| y2   |        | Greater lizardfish          | <0.4 | 0.12 | 4.4  | 0.045 | 0.012  | 1.43 | 0.51 |
| y3   |        | Greater lizardfish          | <0.4 | 0.29 | 4.4  | 0.046 | 0.031  | 0.94 | 2.36 |
| y4   |        | Greater lizardfish          | <0.4 | 0.41 | 5.6  | 0.044 | 0.006  | 1.98 | 2.7  |
| y5   |        | Greater lizardfish          | <0.4 | 0.3  | 4.8  | 0.052 | 0.011  | 2.86 | 7.03 |
| y6   |        | Greater lizardfish          | <0.4 | 0.22 | 5.2  | 0.034 | 0.024  | 1.57 | 0.58 |
| y7   |        | Saurida elongata            | 0.5  | 0.16 | 4.7  | 0.028 | 0.006  | 1.36 | 0.38 |
| y8   |        | Greater lizardfish          | <0.4 | 0.15 | 4.8  | 0.047 | 0.005  | 1.17 | 0.92 |
| y9   |        | Greater lizardfish          | <0.4 | 0.24 | 7.2  | 0.054 | <0.002 | 0.93 | 6.27 |
| y10  |        | Greater lizardfish          | <0.4 | 0.31 | 5.7  | 0.019 | 0.015  | 1.45 | 0.38 |
| y11  |        | Saurida elongata            | <0.4 | 0.32 | 5.3  | 0.053 | 0.018  | 0.86 | 0.28 |
| y12  |        | Saurida elongata            | <0.4 | 0.53 | 7.1  | 0.067 | 0.005  | 1.15 | 7.75 |
| y1   |        | Charybdis miles             | 4.9  | 0.36 | 24   | 1.37  | 0.009  | 16.8 | 0.33 |
| y2   |        | Amussium japonicum formosum | 0.8  | 0.36 | 26.4 | 2.1   | 0.008  | 3    | 0.11 |
| y3   |        | Charybdis granulata         | 8.1  | 0.32 | 24.9 | 0.648 | 0.041  | 25.5 | 1.03 |
| y4   |        | White-hair rough shrimp     | 1.5  | 0.34 | 12.3 | 0.08  | 0.009  | 7.74 | 0.32 |
| y5   |        | White-hair rough shrimp     | 1.4  | 0.43 | 11.2 | 0.066 | 0.006  | 6.27 | 5.09 |
| y5   |        | Amussium japonicum formosum | <0.4 | 0.37 | 27.2 | 0.777 | 0.008  | 4.5  | 0.05 |
| y6   |        | White-hair rough shrimp     | 1.2  | 0.37 | 12.9 | 0.054 | 0.02   | 8.12 | 0.3  |
| y7   |        | White-hair rough shrimp     | 2    | 0.36 | 13.5 | 0.054 | 0.034  | 7.9  | 0.13 |
| y7   |        | Amussium japonicum formosum | 1    | 0.39 | 22.9 | 1.14  | 0.005  | 3    | 0.06 |
| y8   |        | Amussium japonicum formosum | 0.7  | 0.32 | 26.8 | 2.05  | <0.002 | 2.61 | 0.05 |
| y10  |        | Amussium japonicum formosum | 0.5  | 0.25 | 17.5 | 0.564 | <0.002 | 2.11 | 0.06 |
| y11  |        | Calappa philargius          | 4.8  | 0.23 | 57.4 | 1.28  | 0.037  | 37.9 | 1.31 |

|     |        |                             |      |       |      |        |        |      |      |
|-----|--------|-----------------------------|------|-------|------|--------|--------|------|------|
| y11 |        | Amussium japonicum formosum | 0.5  | 0.34  | 21.4 | 2.88   | <0.002 | 2.58 | 0.07 |
| y12 |        | Amussium japonicum formosum | 1.3  | 0.43  | 36.2 | 0.769  | <0.002 | 4.18 | 0.19 |
| y1  | Autumn | Decapterus maruadsi         | 0.07 | <0.04 | 8.52 | 0.013  | 0.016  | 0.9  | 0.69 |
| y2  |        | Blood porgy                 | <0.4 | <0.04 | 5.85 | 0.007  | 0.017  | 1.4  | 0.64 |
| y3  |        | White croaker               | <0.4 | <0.04 | 3.98 | <0.005 | 0.013  | 0.8  | 0.47 |
| y4  |        | Blood porgy                 | <0.4 | <0.04 | 6.76 | <0.005 | 0.014  | 1.6  | 0.66 |
| y5  |        | White croaker               | <0.4 | <0.04 | 4.55 | 0.006  | 0.006  | 0.5  | 0.5  |
| y6  |        | White croaker               | <0.4 | 0.06  | 4.04 | <0.005 | 0.011  | 0.5  | 0.55 |
| y7  |        | White croaker               | 0.4  | <0.04 | 4.18 | <0.005 | 0.01   | 1.8  | 0.26 |
| y8  |        | White croaker               | <0.4 | <0.04 | 4.39 | <0.005 | 0.008  | 0.9  | 0.43 |
| y9  |        | White croaker               | <0.4 | <0.04 | 4.02 | <0.005 | 0.008  | 0.6  | 0.47 |
| y10 |        | Nemipterus japonicus        | <0.4 | <0.04 | 4.07 | <0.005 | 0.005  | 1    | 0.97 |
| y11 |        | White croaker               | <0.4 | <0.04 | 3.46 | 0.006  | 0.01   | 0.5  | 0.24 |
| y12 |        | White croaker               | <0.4 | 0.05  | 4.38 | <0.005 | <0.002 | 0.7  | 0.32 |
| y1  |        | Metapenaeus affinis         | 4.4  | <0.04 | 12.8 | 0.013  | 0.013  | 6.4  | 0.79 |
| y2  |        | Bursa elegans               | 7.5  | <0.04 | 9.39 | 0.596  | 0.01   | 6    | 0.8  |
| y3  |        | Squillid                    | 21.6 | <0.04 | 15.3 | 1.46   | 0.007  | 11   | 0.43 |
| y4  |        | Squillid                    | 24.8 | <0.04 | 12.8 | 1.17   | 0.005  | 7.9  | 0.3  |
| y5  |        | Squillid                    | 13   | <0.04 | 15.8 | 1.26   | 0.013  | 6.5  | 0.56 |
| y6  |        | Squillid                    | 10.3 | <0.04 | 17.9 | 1.25   | 0.017  | 2.8  | 0.48 |
| y7  |        | Squillid                    | 12.6 | <0.04 | 14   | 0.556  | 0.013  | 5.7  | 0.73 |
| y8  |        | Squillid                    | 11.5 | <0.04 | 14.5 | 0.575  | 0.018  | 4.7  | 0.38 |
| y9  |        | Portunus sanguinolentus     | 17.7 | <0.04 | 17.6 | 0.27   | 0.012  | 3.8  | 0.76 |
| y10 |        | Squillid                    | 16   | <0.04 | 13.8 | 0.773  | 0.012  | 3.6  | 0.57 |
| y12 |        | Metapenaeopsis palmensis    | 33.4 | <0.04 | 11.2 | 0.012  | 0.011  | 6.2  | 0.85 |

**Table S5** Evaluation results of zooplankton biodiversity index.

| Site  | Spring  |                      |                         | Autumn  |                      |                         |
|-------|---------|----------------------|-------------------------|---------|----------------------|-------------------------|
|       | Species | total<br>individuals | Diversity<br>Index $H'$ | Species | total<br>individuals | Diversity<br>Index $H'$ |
| H1    | 20      | 132                  | 3.96                    | 22      | 246                  | 3.94                    |
| H2    | 21      | 203                  | 3.9                     | 22      | 612                  | 2.34                    |
| H3    | 18      | 149                  | 3.38                    | 19      | 563                  | 3.56                    |
| H5    | 15      | 253                  | 3.21                    | 21      | 234                  | 3.99                    |
| H6    | 15      | 187                  | 3.37                    |         |                      |                         |
| H8    | 19      | 300                  | 3.59                    | 18      | 270                  | 3.59                    |
| H9    | 17      | 277                  | 3.62                    | 30      | 439                  | 4.15                    |
| H10   | 16      | 196                  | 3.55                    | 20      | 358                  | 3.65                    |
| H12   | 15      | 207                  | 3.61                    | 20      | 231                  | 3.65                    |
| H13   | 23      | 421                  | 3.97                    | 19      | 268                  | 3.72                    |
| H15   | 14      | 182                  | 3.46                    | 18      | 387                  | 3.46                    |
| H17   | 18      | 267                  | 3.7                     |         |                      |                         |
| H18   | 20      | 435                  | 2.48                    | 20      | 684                  | 3.66                    |
| H19   | 13      | 174                  | 3.44                    | 16      | 164                  | 3.55                    |
| H21   | 18      | 267                  | 3.7                     | 18      | 140                  | 3.76                    |
| Mean  | 17      | 243                  | 3.53                    | 20      | 353                  | 3.62                    |
| Range | 13~23   | 132~435              | 2.48~3.97               | 16~30   | 140~684              | 2.34~4.15               |

**Table S6** Potential hazard ratio (PAF) in seawater of HongKong (%).

| Time   | Research stance | Cu | Pd | Zn | Cd | As | Cr | Hg |
|--------|-----------------|----|----|----|----|----|----|----|
| Spring | H1              | 2  | 0  | 1  | 0  | 0  | 0  | 0  |
|        | H2              | 0  | 0  | 1  | 0  | 0  | 0  | 0  |
|        | H3              | 6  | 0  | 1  | 0  | 0  | 0  | 0  |
|        | H4              | 0  | 0  | 1  | 0  | 0  | 0  | 0  |
|        | H5              | 0  | 0  | 0  | 0  | 0  | 0  | 0  |
|        | H6              | 0  | 0  | 1  | 0  | 0  | 0  | 0  |
|        | H7              | 0  | 0  | 1  | 0  | 0  | 0  | 0  |
|        | H8              | 1  | 0  | 2  | 0  | 0  | 0  | 0  |
|        | H9              | 0  | 0  | 1  | 0  | 0  | 0  | 0  |
|        | H10             | 0  | 0  | 1  | 0  | 0  | 0  | 0  |
|        | H11             | 2  | 0  | 1  | 0  | 0  | 0  | 0  |
|        | H12             | 0  | 0  | 2  | 0  | 0  | 0  | 0  |
|        | H13             | 0  | 0  | 2  | 0  | 0  | 0  | 0  |
|        | H14             | 0  | 0  | 1  | 0  | 0  | 0  | 0  |
|        | H15             | 0  | 0  | 1  | 0  | 0  | 0  | 0  |
|        | H16             | 0  | 0  | 2  | 0  | 0  | 0  | 0  |
|        | H17             | 0  | 0  | 2  | 0  | 0  | 0  | 0  |
|        | H18             | 0  | 0  | 0  | 0  | 0  | 0  | 0  |
|        | H19             | 5  | 0  | 1  | 0  | 0  | 0  | 0  |
|        | H20             | 0  | 0  | 2  | 0  | 0  | 0  | 0  |
|        | H21             | 0  | 0  | 1  | 0  | 0  | 0  | 0  |
| Autumn | H1              | 2  | 0  | 2  | 0  | 0  | 0  | 0  |

---

|     |   |   |   |   |   |   |   |
|-----|---|---|---|---|---|---|---|
| H2  | 1 | 0 | 1 | 0 | 0 | 0 | 0 |
| H3  | 0 | 0 | 1 | 0 | 0 | 0 | 0 |
| H4  | 1 | 0 | 0 | 0 | 0 | 0 | 0 |
| H5  | 0 | 0 | 0 | 0 | 0 | 0 | 0 |
| H6  | 1 | 0 | 2 | 0 | 0 | 0 | 0 |
| H7  | 1 | 0 | 2 | 0 | 0 | 0 | 0 |
| H8  | 0 | 0 | 1 | 0 | 0 | 0 | 0 |
| H9  | 0 | 0 | 0 | 0 | 0 | 0 | 0 |
| H10 | 1 | 0 | 1 | 0 | 0 | 0 | 0 |
| H11 | 1 | 0 | 2 | 0 | 0 | 0 | 0 |
| H12 | 2 | 0 | 2 | 0 | 0 | 0 | 0 |
| H13 | 0 | 0 | 0 | 0 | 0 | 0 | 0 |
| H14 | 0 | 0 | 0 | 0 | 0 | 0 | 0 |
| H15 | 0 | 0 | 3 | 0 | 0 | 0 | 0 |
| H16 | 1 | 0 | 0 | 0 | 0 | 0 | 0 |
| H17 | 0 | 0 | 0 | 0 | 0 | 0 | 0 |
| H18 | 0 | 0 | 0 | 0 | 0 | 0 | 0 |
| H19 | 0 | 0 | 1 | 0 | 0 | 0 | 0 |
| H20 | 0 | 0 | 2 | 0 | 0 | 0 | 0 |
| H21 | 1 | 0 | 1 | 0 | 0 | 0 | 0 |

---
